# Supplementary material for: Functional Study on Cytochrome P450 in Response to L(−)-Carvone Stress in Bursaphelenchus xylophilus
Source: MDPI journal article supplement (doi:10.3390/genes13111956), 2022-10-27
Supplement: s1 [file s1]

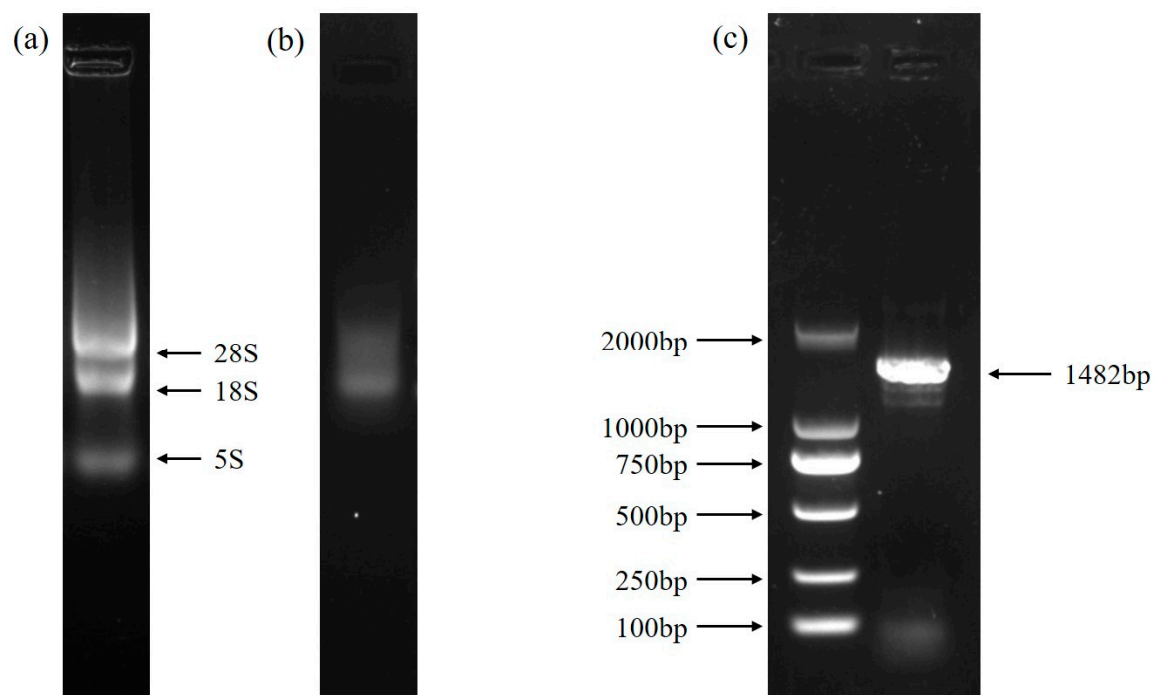

**Figure S1.** Total RNA of PWNs and CDS region of *Bx-cyp29A3*. (a) Total RNA of PWN; (b) CDNA of PWN; (c) lane M DL2000 DNA marker; Lane 1: CDS of *Bx-cyp29A3*.

>BXYJ5.010288100. cds: protein\_coding

```
ATGGCGTCGATTGTTGCGATTGCTTTGACTTTGATGTCTGCTTATATTGTGAATGCCATTCTGCCGGCGTTCTTGTGTAT
ATTCGGCAGAAATGGATTGCGCGCAACTTGCCCGGCCCAAGAACAGACTTCTTCTTTGGCAACATTCTGCAATCCCCA
AAGAATACAAAGATTATCGTGACTATTTCTCGGCTTCGCCAACGAAGAGATTGCCAAAGGTCATAGTGTGGCGAGATT
ATGGGTTGCGAATCAGCTGTTTGTTTACCCGTTGAACAGCGACGCGACTCGCGCCATAACTTCCAGCACCGTCGAGCT
GAACAAGGGCGACGTCTACAGTTTTGTGGGACGTTGGCTGGGAAAGGGGCTCATCACGATCGGAAATGAGGAGCGAT
GGCATCGGAATCGCCGTCTTCTGACGCCGGCCTTTCATTTGCGAAAGCTGGACGAGTACATCCAGACTATTGATAGGCA
TGCAAGGCATTTGGTGCAAGTTATCCGCCAAAAATGCACCACTGGCCAAATTGACCTTTATCCGATAATCAAAATGTGT
GCGTTGGATGTGATTACCGACACCGCCATGGGCTGTCATATCAATGCGTTGGAGGACTCGGAACATCCGTACGTCAGAG
CCGTCCAGAAGTTCAACCATCTTATCTACATCAGAGCCATGAACCCGCTCTTATCCATATCGCTAGTTTGGACCTATTGG
GGTATGAGAGGGAGAGCCAGAAGGCGTTGAAGGTGTTGAAGGACCAGACGTTTCAGGTGGTTACGGAGAGAATAAAA
CAACGCAAATTTGGAGGACGCTAAGCCCCGGCCGACTTCTTGGATCTGCTTTTGGATGAGTTTGACAAAGGAACGTTG
CCTTTTGAGGAAATCTGCGAAGAGGTGGACACATTCATGTTTGCCGGCCACGACACCACATCGCACGGTATCTCGTGG
ATCCTTTGGGCATTGGCTTGTCATCCCGAGGTTTCAGGAGCAACTCTACGCCGAATTAATTGACAATTTCCCGAGCAAAG
AAGGTCTGTGCGCCATCAAGCAAAAGAATCTCAAATATTTGGATGCGGTTGTGAAAGAAGGACTTCGAATTTCCCGG
CGGTTCCGTTTGTGCAAGACGTTGGTAAATGACTTGAGAAATGGATGGGTACCTTATCCGAGGGGCGCTCAAGTCA
CAATCGCACCATACTTTCTACATCACAATCCAAAGGTTTTTGCAAATCACATGGAGTTTGATCCGAACAACCTTCTGTCC
GGCAGGGACTACGAAAGCAATGCATATATTCATTAGCAGTGGGATGAGAAATTGTATTGGCCAACGATTGCTCTGTA
CGAAATGAAAATCGTGGTTGCCTATTTGGTGTGAACTTTACATTCTCGTCCGCCGGCCTCGGATTTGCGGAGAACTATC
CGACCTTTGAAGTCATCTCCAGCCAGTCATGGAGTCCCCGTCATTTTGAAGAACGATGA
```

> BXYJ5.010288100 protein

```
MASIVAIALTMSAYIVNAILPAFLLYIRQKWIARNLPGPRTDFFGNILQFPKEYKDYRDYFLGFANEEIAKGHSVARLWVA
NQLFVYPLNSDATRAITSSTVELNKGDVYSFVGRWLKGKGLITIGNEERWHRNRRLLTPAFHFAKLDEYIQTIDRHARHLVQV
IRQKCTTGQIDLYPIIKMCALDVITDTAMGCHINALEDSEHPYVRAVQKFNHLYIRAMNPLLSISLVWTYLGYERESQKALK
VLKDQTFQVVTERIKQRKLEDAKPRPDFLDLLLDEFDKGLTPFEEICEEVDTFMFAGHDTTSHGISWILWALACHPEVQEQ
YAEIDNFPKSKEGLSAIKQKNLKYLDVVKELRIFPAVPFVQRRRLVNDLRMDGYLIPRGAQVTIAPYFLHHNPVFNHME
FDPNNFLSGRDYESNAYIPFSSGMRNCIGRFALYEMKIVVAYLVNFTFSSAGLGFRENYPTFEVILQPSHGVPVILEER
```

**Figure S2.** The cDNA and deduced amino acid sequence of *Bx-cyp29A3*
